# Supplementary material
Source: PubMed Central journal article supplement (PMC9595441)
Supplement: mmc1.pdf [file mmc1.pdf]

# THE LANCET Public Health

## Supplementary appendix

This appendix formed part of the original submission and has been peer reviewed.  
We post it as supplied by the authors.

Supplement to: Bennett DL, Schlüter DK, Melis G, et al. Child poverty and children entering care in England, 2015–20: a longitudinal ecological study at the local area level. *Lancet Public Health* 2022; **7**: 496–503.

## Appendix

### Contents

|                                                                                                                                            |    |
|--------------------------------------------------------------------------------------------------------------------------------------------|----|
| National trends .....                                                                                                                      | 2  |
| Suppressed data.....                                                                                                                       | 3  |
| Main model formula .....                                                                                                                   | 4  |
| Cost estimates .....                                                                                                                       | 4  |
| <i>Corporate parenting costs associated with rising child poverty from 2015</i> .....                                                      | 4  |
| <i>Corporate parenting costs associated with the revocation of the £20-per-week Universal Credit uplift and minimum income floor</i> ..... | 4  |
| Robustness tests .....                                                                                                                     | 5  |
| <i>Alternative data sources and measures</i> .....                                                                                         | 5  |
| <i>Alternative modelling approaches</i> .....                                                                                              | 5  |
| <i>Excluding observations with extreme values</i> .....                                                                                    | 6  |
| <i>Controlling for local authority prevention spend</i> .....                                                                              | 6  |
| <i>Discussion of robustness test results</i> .....                                                                                         | 6  |
| Summary statistics .....                                                                                                                   | 8  |
| Local authorities exhibiting large changes in exposure and outcomes .....                                                                  | 9  |
| Full main linear regression model output .....                                                                                             | 10 |
| Summary robustness test results .....                                                                                                      | 11 |
| Full linear regression model output, using absolute poverty before housing costs as the exposure .....                                     | 13 |
| Full linear regression model output, using relative poverty after housing costs as the exposure .....                                      | 14 |
| Full Poisson regression model output .....                                                                                                 | 15 |
| Linear regression model output, controlling for local authority prevention spend .....                                                     | 16 |
| Appendix references .....                                                                                                                  | 17 |

**National trends**

Figure 1. National trends in child poverty rates, rates of children in care at 31st March, per 10,000, and rates of children entering care, per 10,000, in England.

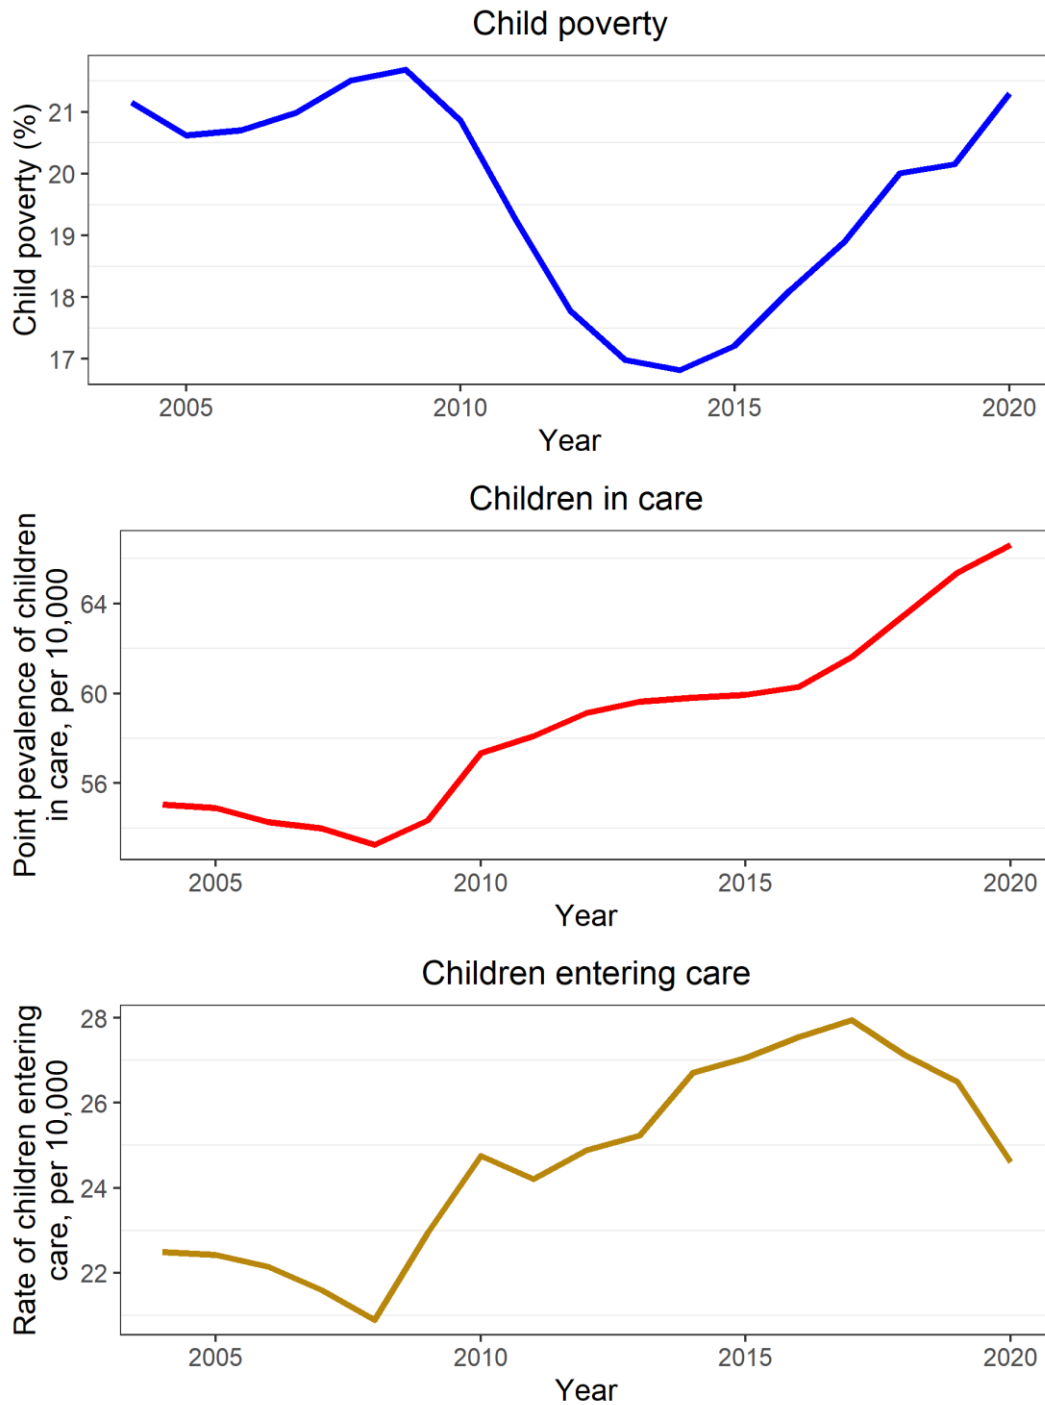

Note: Relative child poverty before housing costs data are taken from Households Below Average Income statistics, and represent three-year right-aligned rolling averages.

## Suppressed data

In publicly available data, for the purposes of confidentiality, cell contents were suppressed if the count of children was between 1 and 5 inclusive. Tables 1 and 2 show the count of local authorities for which data were suppressed, by year and age group. There were fewer instances of suppression among children aged over 15 than among children in the relevant age groups, combined. And complete data on the total count of children entering care (all ages) were available for the period 2015-20. Therefore, to derive the count of children under 16 entering care, we randomly imputed an integer between 1 and 5 for children over 15 entering care (54 imputations), then subtracted counts for children over 15 from the total number of children entering care.

Complete data were available for children under 16 being made subject to a child protection plan and beginning an ‘episode of need’. No imputation was necessary.

*Table 1. Count of local authorities for which data are suppressed, by year and age groups of interest.*

|              | Count of LAs for which data are suppressed |     |     |       |       |
|--------------|--------------------------------------------|-----|-----|-------|-------|
|              | Age group                                  |     |     |       |       |
| Year         | <1                                         | 1-4 | 5-9 | 10-15 | Total |
| 2015         | 9                                          | 4   | 7   | 1     | 21    |
| 2016         | 4                                          | 4   | 5   | 0     | 13    |
| 2017         | 5                                          | 6   | 3   | 2     | 16    |
| 2018         | 4                                          | 8   | 4   | 2     | 18    |
| 2019         | 5                                          | 7   | 7   | 2     | 21    |
| 2020         | 7                                          | 9   | 15  | 2     | 33    |
| <b>Total</b> | 34                                         | 38  | 41  | 9     | 122   |

*Table 2. Count of local authorities for which data are suppressed, by year, for young people over the age of 15*

|              | Count of LAs for which data are suppressed |
|--------------|--------------------------------------------|
| Year         | Age group >15                              |
| 2015         | 15                                         |
| 2016         | 5                                          |
| 2017         | 6                                          |
| 2018         | 10                                         |
| 2019         | 6                                          |
| 2020         | 12                                         |
| <b>Total</b> | 54                                         |

**Main model formula**

Let:

- $Y_{it}$  denote the sCLA / sCPP / sCIN rate, dependent on LA  $i$  and year  $t$
- $x_{1it}$  denote the child poverty rate, dependent on LA  $i$  and year  $t$
- $x_{2it}$  denote the employment rate, dependent on LA  $i$  and year  $t$
- $U_i$  denote LA random effects
- $\delta_t$  denote a series of dummy variables for each year  $t$
- $\varepsilon_{it} \sim N(0, S_1)$  denote the random error for LA  $i$  in year  $t$
- The overbar denote time-averages
- The superscript <sup>w</sup> or <sup>b</sup> denote decomposition into within- or between- LA effects of covariates

$$Y_{it} = \beta_0 + \beta_1^w(x_{1it} - \bar{x}_{1i}) + \beta_1^b(\bar{x}_{1i}) + \beta_2^w(x_{2it} - \bar{x}_{2i}) + \beta_2^b(\bar{x}_{2i}) + U_i + \delta_t + \varepsilon_{it}$$

**Cost estimates***Corporate parenting costs associated with rising child poverty from 2015*

Based on our estimates of the annual marginal difference between observed trends in sCLA rates, and trends that might have been expected had child poverty rates from 2015 remained stable, employment trends unaltered, we estimated the corporate parenting costs associated with the difference. We used 2015-20 data on mean weekly expenditure per child in care, compiled by the Local Government Association,<sup>1</sup> and data for the same period on the mean duration of last period of care for children leaving care, from the Department for Education.<sup>2</sup> For each year, we multiplied our difference estimates by the mean annual cost, and mean duration of placement. We summed costs over the time period to obtain our overall estimate.

*Corporate parenting costs associated with the revocation of the £20-per-week Universal Credit uplift and minimum income floor*

Using Legatum Institute estimates of the number of children protected from moving into poverty by the £20 weekly Universal Credit uplift and minimum income floor,<sup>3</sup> and Department for Work and Pensions data on the number of children in poverty in the UK,<sup>4</sup> we derived the percentage rise in child poverty represented by a revocation of these protective measures. We then multiplied this percentage rise by our model estimates to contextualise the impact of the revocation on children and families' involvement with children's social care.

Assuming that the relationship between child poverty and statutory child welfare interventions across the UK is comparable to that in England, and assuming comparable Social Metrics Commission and Households Below Average Income child poverty data, we estimate that the cut is likely to lead an additional 1,508 children entering care [95% CI 638–2,407]; 5,597 children becoming subject to a child protection plan [95% CI 3,596–7,627]; and 15,138 additional children beginning an episode of need, or receiving some form of care and support from the local authority [95% CI 3,944–26,332], each year.

Accordingly, using data on mean weekly expenditure per child in care,<sup>1</sup> and mean duration of last period of care for children leaving care,<sup>2</sup> as above, we used 2020 data to estimate the corporate parenting costs associated with the additional children likely to enter care as a result of the revocation. This amounts to an additional £225.6 million [£95.4 million – £360.0 million], each year.

### **Robustness tests**

#### *Alternative data sources and measures*

In robustness tests, as alternative measures of our exposure, we used: 1) absolute child poverty before housing costs, and 2) relative child poverty after housing costs. Absolute child poverty is measured against a static threshold that rises only with inflation, regardless of how the prosperity of a whole society may shift.<sup>5</sup> In official data this threshold is set to 2011, with absolute child poverty defined as the proportion of children living in households with less than 60% of the 2011 median income, adjusted for inflation.<sup>6</sup> Our measure of relative child poverty after housing costs is derived from before housing costs data by the Centre for Research in Social Policy. It takes into account the cost of rent, water, mortgage interest payments, buildings insurance payments, ground rent and service charges.<sup>7</sup>

#### *Alternative modelling approaches*

In our main analysis we used linear models: visually, we assessed that the relationship seemed to be more linear than log-linear. However, Poisson models may also be appropriate to the count data. We therefore also used an alternative modelling approach, fitting Poisson within-between regression models to data on the number of children experiencing the different interventions, with the log of the relevant child population as an offset in the analysis, instead of modelling intervention rates directly. In the Poisson models, we accounted for overdispersion by including observation-level random effects.<sup>8</sup>

*Excluding observations with extreme values*

Using the Bonferroni outlier test,<sup>9</sup> we identified observations with extreme values that may be unduly influential in our models. We reran our main analyses, excluding each of these observations in turn.

*Controlling for local authority prevention spend*

Local authority spend on preventative children's services is intended to directly affect our outcome of interest by reducing the need for statutory interventions.<sup>10</sup> However, the relationship of prevention spend to our exposure may be more complex. Prevention spend may act as a mediator of the effect of child poverty on intervention rates: decisions about spend may be influenced by level of anticipated need in an area. This was our assumption in the main models; we deliberately do not control for likely causal mediators of the relationship of interest. However, prevention spend may also act as a confounder. Prevention strategies that target the social determinants of need, for example supporting families with benefits maximisation or finding employment, may alleviate child poverty, directly affecting both exposure and outcome.

We therefore conducted an additional robustness test, controlling for prevention spend per child in the previous financial year. Local authority finance data were taken from Section 251 spending returns.<sup>11</sup> In our measure of prevention spend per child under 18, we summed spend categories relating to early help and family support services (sure start and early years; family support services; services for young people; youth justice; other children and family services), and excluded categories relating to child protection social work or children already in care. The denominator was the population of children under 18, taken from Office for National Statistics (ONS) mid-year population estimates.

We hypothesised that prevention spend would likely have a lagged effect; this modelling decision ensures that prevention spend precedes the exposure so cannot be considered a direct mediator. Nevertheless, the correlation of observations across years within areas means that disentangling the potential pathways remains complex.

*Discussion of robustness test results*

Summary and full model output for robustness tests are shown in appendix tables 8-17. Robustness tests using alternative measures of our exposure show that, for our main outcome and more acute secondary outcome, findings are robust to the specification of poverty type

## Appendix

(appendix table 8). For children in need, however, the poverty measure accounting for housing costs revises the effect estimate downwards, with wide confidence intervals spanning the null.

The Poisson regression models validate our main finding of an association between child poverty rates and intervention rates within local authorities, across the spectrum of statutory interventions (appendix table 9). They additionally highlight the greater relative increase in children being placed on a child protection plan compared to our main outcome and less acute secondary outcome, for a given increase in the child poverty rate, holding employment rates constant.

Excluding from our analyses each observation with extreme values, identified from our models using the Bonferroni outlier test, suggests that no single observation is unduly influential (appendix tables 10-12). Overall, removal leads to slightly attenuated point estimates for the sCLA and sCPP models. This is to be expected given that the observations with extreme values tend to reflect more deprived local authorities experiencing greater increases in child poverty and intervention rates.

Across all outcomes, additionally controlling for local authority prevention spend per child in the previous year does not meaningfully alter our estimates (appendix table 13). In this robustness test, we considered prevention spend a confounder of the relationship of interest. However, if preventative services were in fact mediating the effect of child poverty by anticipating and addressing need, we might expect point estimates to be revised upwards when controlling for prevention spend. That our estimates are unaffected might indicate that, in the absence of national efforts to shift the distribution of children's exposure to poverty, local efforts to mitigate the consequences may simply be insufficient. Given the restricted time period for the analysis, our model may also be underpowered to detect the impact of preventative spend. Further research is needed to disentangle the respective roles of poverty and preventative services in determining children's outcomes.



## Appendix

### Summary statistics

Table 3. Summary statistics for main outcome variable

| Year | Main outcome variable                 |        |        |        |
|------|---------------------------------------|--------|--------|--------|
|      | sCLA rate (per 100,000 children < 16) |        |        |        |
|      | Mean                                  | Sd.    | Min    | Max    |
| 2015 | 280.05                                | 110.91 | 98.28  | 678.29 |
| 2016 | 277.42                                | 110.63 | 73.85  | 823.03 |
| 2017 | 290.52                                | 132.43 | 58.53  | 996.18 |
| 2018 | 273.36                                | 118.79 | 75.91  | 778.21 |
| 2019 | 262.07                                | 125.49 | 87.95  | 693.29 |
| 2020 | 260.00                                | 141.41 | 101.93 | 931.88 |

Table 4. Summary statistics for secondary outcome variables

| Year | Secondary outcome variables           |        |        |         |                                       |         |         |         |
|------|---------------------------------------|--------|--------|---------|---------------------------------------|---------|---------|---------|
|      | sCPP rate (per 100,000 children < 16) |        |        |         | sCIN rate (per 100,000 children < 16) |         |         |         |
|      | Mean                                  | Sd.    | Min    | Max     | Mean                                  | Sd.     | Min     | Max     |
| 2015 | 605.70                                | 220.05 | 159.34 | 1687.83 | 3374.99                               | 1395.97 | 1269.09 | 7884.70 |
| 2016 | 623.70                                | 244.42 | 173.61 | 1921.71 | 3295.18                               | 1189.50 | 1120.76 | 7816.81 |
| 2017 | 640.42                                | 250.79 | 216.42 | 2232.55 | 3317.60                               | 1231.04 | 1241.81 | 9489.46 |
| 2018 | 651.59                                | 254.26 | 223.29 | 1634.24 | 3299.84                               | 1108.04 | 1221.51 | 6735.77 |
| 2019 | 617.13                                | 241.93 | 160.96 | 1775.60 | 3262.75                               | 1072.43 | 1114.47 | 6876.37 |
| 2020 | 622.71                                | 271.87 | 167.88 | 1601.16 | 3234.23                               | 1235.58 | 1041.92 | 8145.64 |

Table 5. Summary statistics for exposure variable

| Year | Main exposure variable                           |      |      |       |
|------|--------------------------------------------------|------|------|-------|
|      | Relative child poverty, before housing costs (%) |      |      |       |
|      | Mean                                             | Sd.  | Min  | Max   |
| 2015 | 15.62                                            | 5.16 | 5.35 | 29.73 |
| 2016 | 16.41                                            | 5.75 | 5.21 | 32.41 |
| 2017 | 17.33                                            | 6.28 | 5.35 | 34.63 |
| 2018 | 18.48                                            | 6.55 | 6.26 | 37.42 |
| 2019 | 18.73                                            | 6.74 | 6.17 | 38.34 |
| 2020 | 19.75                                            | 7.24 | 6.88 | 38.63 |

Table 6. Summary statistics for control variable

| Year | Control variable    |      |       |       |
|------|---------------------|------|-------|-------|
|      | Employment rate (%) |      |       |       |
|      | Mean                | Sd.  | Min   | Max   |
| 2015 | 72.26               | 5.03 | 60.00 | 82.90 |
| 2016 | 73.31               | 4.87 | 60.40 | 84.20 |
| 2017 | 73.74               | 4.99 | 60.90 | 82.30 |
| 2018 | 74.52               | 4.89 | 58.70 | 84.40 |
| 2019 | 74.85               | 4.61 | 61.70 | 84.30 |
| 2020 | 75.56               | 4.58 | 64.50 | 84.20 |

**Local authorities exhibiting large changes in exposure and outcomes**

Figure 2. Associations between the change in the child poverty rate between 2015 and 2020, and intervention rates for each of our outcomes between 2015 and 2020, in each local authority, with 95% confidence intervals. Extreme values are labelled with the name of the corresponding local authority.

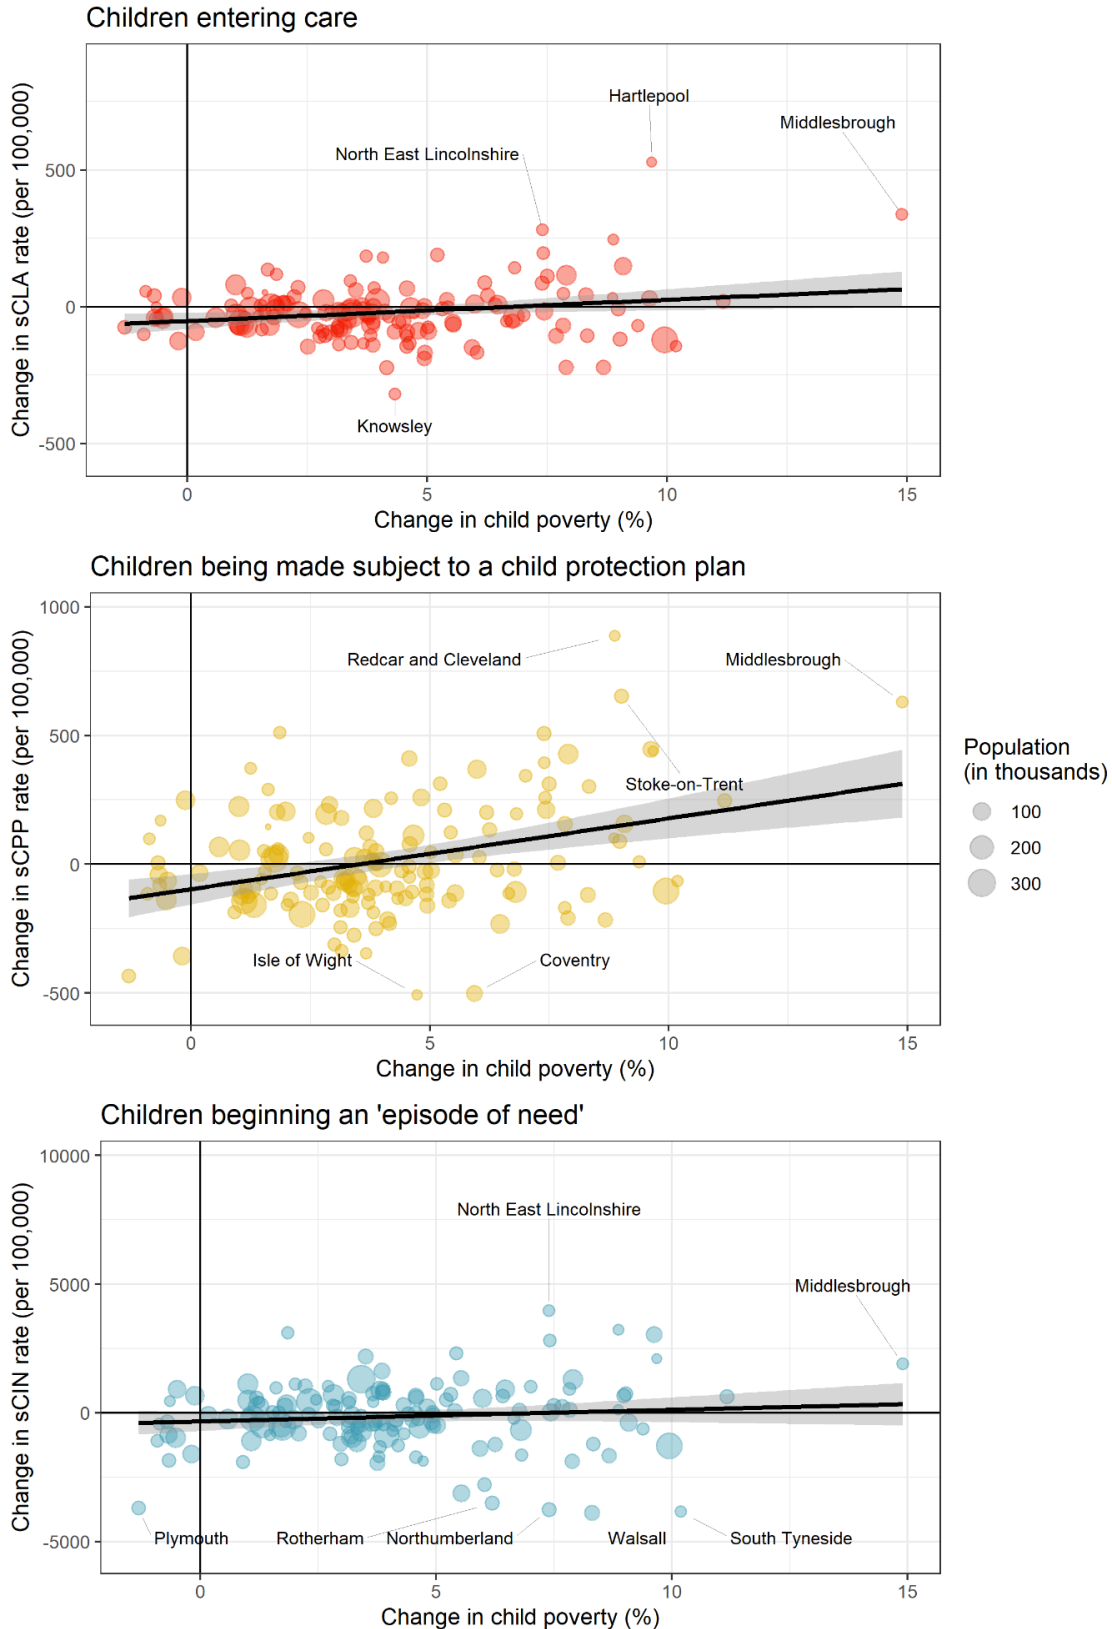

Appendix

**Full main linear regression model output**

Table 7. Full main linear regression model output.

| Parameter                                                        | sCLA     |           | sCPP     |           | sCIN     |           |
|------------------------------------------------------------------|----------|-----------|----------|-----------|----------|-----------|
|                                                                  | Estimate | Std. Err. | Estimate | Std. Err. | Estimate | Std. Err. |
| <b>Fixed part</b>                                                |          |           |          |           |          |           |
| $\beta_0$ Intercept                                              | 335.81   | 230.17    | 429.19   | 458.52    | 8957.33  | 2088.45   |
| $\beta_1^w$ Relative poverty                                     | 5.21     | 1.55      | 19.35    | 3.57      | 52.17    | 19.69     |
| $\beta_1^b$ Relative poverty                                     | 8.85     | 1.99      | 18.01    | 3.97      | 38.84    | 18.09     |
| $\beta_2^w$ Employment                                           | 0.48     | 1.17      | 0.73     | 2.68      | -20.86   | 14.79     |
| $\beta_2^b$ Employment                                           | -2.71    | 2.72      | -1.36    | 5.41      | -83.71   | 24.63     |
| $\delta_{2015}$ Year                                             | -        | -         | -        | -         | -        | -         |
| $\delta_{2016}$ Year                                             | -7.28    | 6.67      | 1.84     | 15.35     | -99.38   | 84.68     |
| $\delta_{2017}$ Year                                             | 0.85     | 7.18      | 0.58     | 16.51     | -115.58  | 91.08     |
| $\delta_{2018}$ Year                                             | -22.72   | 8.26      | -11.21   | 19.00     | -177.54  | 104.79    |
| $\delta_{2019}$ Year                                             | -35.45   | 8.60      | -50.66   | 19.78     | -220.44  | 109.11    |
| $\delta_{2020}$ Year                                             | -43.21   | 9.87      | -65.43   | 22.71     | -287.74  | 125.26    |
| <b>Random part: LA level</b>                                     |          |           |          |           |          |           |
| Intercept variance                                               | 7913     | 88.95     | 30720    | 175.3     | 611019   | 781.7     |
| <b>Random part: observation level</b>                            |          |           |          |           |          |           |
| Residual variance                                                | 3051     | 55.24     | 16148    | 127.1     | 491319   | 700.9     |
| Deviance                                                         | 9992.2   |           | 11419.5  |           | 14375.4  |           |
| Log likelihood                                                   | -4996.1  |           | -5709.5  |           | -7187.7  |           |
| Number of local authorities                                      | 147      |           | 147      |           | 147      |           |
| Number of observations                                           | 882      |           | 882      |           | 882      |           |
| Note: the outcome is the intervention rate, per 100,000 children |          |           |          |           |          |           |

## Summary robustness test results

Table 8. Linear regression model output, using alternative measures of our exposure. For full model output, see tables 14-15.

| Poverty measure                                     | Within-LA effects: Annual change in the rate per 100,000 for a 1 percentage point increase in child poverty, controlling for employment rates [95% CI] |                                                  |                                       |
|-----------------------------------------------------|--------------------------------------------------------------------------------------------------------------------------------------------------------|--------------------------------------------------|---------------------------------------|
|                                                     | Children starting to be looked after                                                                                                                   | Children made subject to a child protection plan | Children beginning an episode of need |
| Relative poverty, before housing costs (main model) | 5.2 [2.2, 8.3]                                                                                                                                         | 19.3 [12.4, 26.3]                                | 52.2 [13.6, 90.8]                     |
| Absolute poverty, before housing costs              | 5.6 [1.9, 9.4]                                                                                                                                         | 22.9 [14.3, 31.5]                                | 60.1 [12.6, 107.6]                    |
| Relative poverty, after housing costs               | 5.9 [3.3, 8.5]                                                                                                                                         | 16.3 [10.3, 22.4]                                | 18.6 [-15.0, 52.3]                    |

Table 9. Poisson regression model output, using our main exposure, relative child poverty before housing costs. For full model output, see table 16.

|                                                                                                                                                                           | Children starting to be looked after | Children made subject to a child protection plan | Children beginning an episode of need |
|---------------------------------------------------------------------------------------------------------------------------------------------------------------------------|--------------------------------------|--------------------------------------------------|---------------------------------------|
| Within-LA effects: Percentage change in the rate for a 1 percentage point increase in child poverty, controlling for employment rates [95% CI]                            | 1.3% [0.3%, 2.2%]                    | 2.4% [1.3%, 3.5%]                                | 1.6% [0.5%, 2.6%]                     |
| Between-LA effects: Percentage change in the rate for a 1 percentage point increase in average child poverty rates between LAs, controlling for employment rates [95% CI] | 3.8% [2.5%, 5.1%]                    | 3.4% [2.2%, 4.6%]                                | 1.3% [0.3%, 2.4%]                     |

Table 10. sCLA linear regression model output, excluding observations with extreme values, as identified using the Bonferroni outlier test.

| Mean-shift outliers, identified using the Bonferroni outlier test |      | sCLA model estimates excluding outlier observation                                                                                                          |
|-------------------------------------------------------------------|------|-------------------------------------------------------------------------------------------------------------------------------------------------------------|
| Local authority                                                   | Year | Within-LA effects: Annual change in the sCLA rate per 100,000 for a 1 percentage point increase in child poverty, controlling for employment rates [95% CI] |
| Hartlepool                                                        | 2015 | 4.5 [1.6, 7.5]                                                                                                                                              |
| Middlesbrough                                                     | 2020 | 4.0 [1.0, 7.1]                                                                                                                                              |
| Hartlepool                                                        | 2020 | 4.5 [1.5, 7.5]                                                                                                                                              |
| North East Lincolnshire                                           | 2020 | 4.6 [1.6, 7.6]                                                                                                                                              |
| Kingston upon Thames                                              | 2018 | 5.2 [2.2, 8.3]                                                                                                                                              |

## Appendix

Table 11. sCPP linear regression model output, excluding observations with extreme values, as identified using the Bonferroni test

| Mean-shift outliers, identified using the Bonferroni outlier test |      | sCPP model estimates excluding outlier observation                                                                                                          |
|-------------------------------------------------------------------|------|-------------------------------------------------------------------------------------------------------------------------------------------------------------|
| Local authority                                                   | Year | Within-LA effects: Annual change in the sCPP rate per 100,000 for a 1 percentage point increase in child poverty, controlling for employment rates [95% CI] |
| Blackpool                                                         | 2017 | 19.0 [12.1, 26.0]                                                                                                                                           |
| Redcar and Cleveland                                              | 2020 | 18.2 [11.3, 25.1]                                                                                                                                           |

Table 12. sCIN linear regression model output, excluding observations with extreme values, as identified using the Bonferroni test

| Mean-shift outliers, identified using the Bonferroni outlier test |      | sCIN model estimates excluding outlier observation                                                                                                          |
|-------------------------------------------------------------------|------|-------------------------------------------------------------------------------------------------------------------------------------------------------------|
| Local authority                                                   | Year | Within-LA effects: Annual change in the sCIN rate per 100,000 for a 1 percentage point increase in child poverty, controlling for employment rates [95% CI] |
| City of Nottingham                                                | 2017 | 39.7 [1.6, 77.9]                                                                                                                                            |
| South Tyneside                                                    | 2015 | 60.0 [21.7, 98.2]                                                                                                                                           |
| NE Lincolnshire                                                   | 2020 | 45.0 [6.8, 83.3]                                                                                                                                            |
| Northumberland                                                    | 2015 | 55.2 [17.0, 93.5]                                                                                                                                           |

Table 13. Summary of regression coefficients for the within-area change in our primary and secondary outcomes associated with a change in the child poverty rate, controlling for employment rates and prevention spend per child. For full model see table 18.

|                                                  | Annual change in the rate per 100,000 for a 1 percentage point increase in child poverty, controlling for employment rates <u>and</u> prevention spend per child [95% CI] |
|--------------------------------------------------|---------------------------------------------------------------------------------------------------------------------------------------------------------------------------|
| Children starting to be looked after             | 5.3 [2.2, 8.3]                                                                                                                                                            |
| Children made subject to a child protection plan | 19.6 [12.6, 26.6]                                                                                                                                                         |
| Children beginning an episode of need            | 51.9 [13.2, 90.5]                                                                                                                                                         |

Appendix

**Full linear regression model output, using absolute poverty before housing costs as the exposure**

Table 14. Full linear regression model output, using absolute poverty before housing costs as the exposure

| Parameter                                                        | sCLA     |           | sCPP     |           | sCIN     |           |
|------------------------------------------------------------------|----------|-----------|----------|-----------|----------|-----------|
|                                                                  | Estimate | Std. Err. | Estimate | Std. Err. | Estimate | Std. Err. |
| <b>Fixed part</b>                                                |          |           |          |           |          |           |
| $\beta_0$ Intercept                                              | 348.37   | 229.00    | 384.52   | 453.45    | 8670.51  | 2065.15   |
| $\beta_1^w$ Absolute poverty                                     | 5.61     | 1.91      | 22.87    | 4.40      | 60.06    | 24.23     |
| $\beta_1^b$ Absolute poverty                                     | 9.83     | 2.26      | 20.60    | 4.48      | 46.38    | 20.39     |
| $\beta_2^w$ Employment                                           | 0.57     | 1.17      | 1.07     | 2.69      | -19.98   | 14.81     |
| $\beta_2^b$ Employment                                           | -3.01    | 2.70      | -1.39    | 5.35      | -81.94   | 24.37     |
| $\delta_{2015}$ Year                                             | -        | -         | -        | -         | -        | -         |
| $\delta_{2016}$ Year                                             | -1.01    | 6.60      | 25.93    | 15.20     | 35.05    | 83.78     |
| $\delta_{2017}$ Year                                             | 13.60    | 6.81      | 49.30    | 15.66     | 14.69    | 86.31     |
| $\delta_{2018}$ Year                                             | -5.60    | 7.01      | 53.15    | 16.13     | -4.63    | 88.88     |
| $\delta_{2019}$ Year                                             | -18.55   | 7.13      | 12.32    | 16.41     | -50.79   | 90.42     |
| $\delta_{2020}$ Year                                             | -23.83   | 7.55      | 5.69     | 17.37     | -95.32   | 95.73     |
| Parameter                                                        |          |           |          |           |          |           |
| <b>Random part: LA level</b>                                     |          |           |          |           |          |           |
| Intercept variance                                               | 7949     | 89.16     | 30592    | 174.9     | 608359   | 780.0     |
| <b>Random part: observation level</b>                            |          |           |          |           |          |           |
| Residual variance                                                | 3062     | 55.34     | 16198    | 127.3     | 491902   | 701.4     |
| Deviance                                                         | 9995.5   |           | 11421.2  |           | 14375.7  |           |
| Log likelihood                                                   | -4997.7  |           | -5710.6  |           | -7187.9  |           |
| Number of local authorities                                      | 147      |           | 147      |           | 147      |           |
| Number of observations                                           | 882      |           | 882      |           | 882      |           |
| Note: the outcome is the intervention rate, per 100,000 children |          |           |          |           |          |           |

Appendix

**Full linear regression model output, using relative poverty after housing costs as the exposure**

Table 15. Full linear regression model output, using relative poverty after housing costs as the exposure

| Parameter                                                        | sCLA     |           | sCPP     |           | sCIN     |           |
|------------------------------------------------------------------|----------|-----------|----------|-----------|----------|-----------|
|                                                                  | Estimate | Std. Err. | Estimate | Std. Err. | Estimate | Std. Err. |
| <b>Fixed part</b>                                                |          |           |          |           |          |           |
| $\beta_0$ Intercept                                              | 1247.63  | 205.27    | 2435.98  | 409.09    | 9935.57  | 1752.71   |
| $\beta_1^w$ Relative poverty                                     | 5.91     | 1.34      | 16.33    | 3.10      | 18.64    | 17.15     |
| $\beta_1^b$ Relative poverty                                     | -0.52    | 1.57      | -2.67    | 3.13      | 27.15    | 13.41     |
| $\beta_2^w$ Employment                                           | 0.70     | 1.16      | 1.35     | 2.69      | -20.14   | 14.87     |
| $\beta_2^b$ Employment                                           | -12.72   | 2.31      | -23.23   | 4.60      | -99.94   | 19.70     |
| $\delta_{2015}$ Year                                             | -        | -         | -        | -         | -        | -         |
| $\delta_{2016}$ Year                                             | -7.00    | 6.58      | 6.55     | 15.24     | -70.10   | 84.30     |
| $\delta_{2017}$ Year                                             | -0.92    | 7.06      | 4.12     | 16.35     | -60.20   | 90.45     |
| $\delta_{2018}$ Year                                             | -20.70   | 7.52      | 8.53     | 17.40     | -68.84   | 96.26     |
| $\delta_{2019}$ Year                                             | -33.16   | 7.75      | -28.96   | 17.94     | -102.13  | 99.26     |
| $\delta_{2020}$ Year                                             | -36.71   | 8.20      | -27.03   | 19.00     | -119.54  | 105.09    |
| <b>Random part: LA level</b>                                     |          |           |          |           |          |           |
| Intercept variance                                               | 9040     | 95.08     | 35199    | 187.6     | 612705   | 782.8     |
| <b>Random part: observation level</b>                            |          |           |          |           |          |           |
| Residual variance                                                | 3018     | 54.94     | 16183    | 127.2     | 495216   | 703.7     |
| Deviance                                                         | 10002.5  |           | 11439.6  |           | 14381.7  |           |
| Log likelihood                                                   | -5001.3  |           | -5719.8  |           | -7190.9  |           |
| Number of local authorities                                      | 147      |           | 147      |           | 147      |           |
| Number of observations                                           | 882      |           | 882      |           | 882      |           |
| Note: the outcome is the intervention rate, per 100,000 children |          |           |          |           |          |           |

Appendix

**Full Poisson regression model output**

Table 16. Full Poisson regression model output.

| Parameter                                                                  | sCLA     |           | sCPP     |           | sCIN     |           |
|----------------------------------------------------------------------------|----------|-----------|----------|-----------|----------|-----------|
|                                                                            | Estimate | Std. Err. | Estimate | Std. Err. | Estimate | Std. Err. |
| <b>Fixed part</b>                                                          |          |           |          |           |          |           |
| $\beta_0$ Intercept                                                        | -6.46    | 0.74      | -6.23    | 0.68      | -1.90    | 0.62      |
| $\beta_1^w$ Relative poverty                                               | 0.01     | 0.00      | 0.02     | 0.01      | 0.02     | 0.01      |
| $\beta_1^b$ Relative poverty                                               | 0.04     | 0.01      | 0.03     | 0.01      | 0.01     | 0.01      |
| $\beta_2^w$ Employment                                                     | 0.00     | 0.00      | 0.00     | 0.00      | -0.00    | 0.00      |
| $\beta_2^b$ Employment                                                     | -0.00    | 0.01      | 0.01     | 0.01      | -0.02    | 0.01      |
| $\delta_{2015}$ Year                                                       | -        | -         | -        | -         | -        | -         |
| $\delta_{2016}$ Year                                                       | -0.02    | 0.02      | 0.00     | 0.02      | -0.02    | 0.02      |
| $\delta_{2017}$ Year                                                       | -0.00    | 0.02      | 0.01     | 0.03      | -0.02    | 0.03      |
| $\delta_{2018}$ Year                                                       | -0.07    | 0.03      | 0.00     | 0.03      | -0.03    | 0.02      |
| $\delta_{2019}$ Year                                                       | -0.13    | 0.03      | -0.06    | 0.03      | -0.05    | 0.03      |
| $\delta_{2020}$ Year                                                       | -0.17    | 0.03      | -0.09    | 0.04      |          |           |
|                                                                            |          |           |          |           |          |           |
| Parameter                                                                  | Estimate | Std. Dev. | Estimate | Std. Dev. | Estimate | Std. Dev. |
| <b>Random part: LA level</b>                                               |          |           |          |           |          |           |
| Intercept variance                                                         | 0.08     | 0.28      | 0.07     | 0.26      | 0.05     | 0.23      |
|                                                                            |          |           |          |           |          |           |
| <b>Random part: observation level</b>                                      |          |           |          |           |          |           |
| Intercept variance                                                         | 0.02     | 0.16      | 0.03     | 0.19      | 0.04     | 0.19      |
|                                                                            |          |           |          |           |          |           |
| Deviance                                                                   | 8693.6   |           | 10283.3  |           | 13161.4  |           |
| Log likelihood                                                             | -4346.8  |           | -5141.7  |           | -6580.7  |           |
| Number of local authorities                                                | 147      |           | 147      |           | 147      |           |
| Number of observations                                                     | 882      |           | 882      |           | 882      |           |
|                                                                            |          |           |          |           |          |           |
| Note: the outcome is the log of the intervention rate per 100,000 children |          |           |          |           |          |           |



Appendix

**Linear regression model output, controlling for local authority prevention spend**

Table 17. Linear regression model output, additionally controlling for prevention spend per child the year before

| Parameter                                                        | sCLA     |           | sCPP     |           | sCIN     |           |
|------------------------------------------------------------------|----------|-----------|----------|-----------|----------|-----------|
|                                                                  | Estimate | Std. Err. | Estimate | Std. Err. | Estimate | Std. Err. |
| <b>Fixed part</b>                                                |          |           |          |           |          |           |
| $\beta_0$ Intercept                                              | 26.14    | 249.84    | -80.24   | 502.02    | 5906.89  | 2255.14   |
| $\beta_1^w$ Relative poverty                                     | 5.25     | 1.55      | 19.56    | 3.57      | 51.86    | 19.70     |
| $\beta_1^b$ Relative poverty                                     | 9.96     | 1.98      | 19.82    | 3.98      | 49.82    | 17.89     |
| $\beta_2^w$ Employment                                           | 0.47     | 1.17      | 0.63     | 2.68      | -20.71   | 14.80     |
| $\beta_2^b$ Employment                                           | 0.31     | 2.86      | 3.57     | 5.74      | -53.81   | 25.78     |
| $\beta_3^w$ Prevention spend per child the year before           | 0.04     | 0.06      | 0.21     | 0.13      | -0.30    | 0.73      |
| $\beta_3^b$ Prevention spend per child the year before           | 0.27     | 0.10      | 0.44     | 0.20      | 2.70     | 0.87      |
| $\delta_{2015}$ Year                                             | -        | -         | -        | -         | -        | -         |
| $\delta_{2016}$ Year                                             | -6.91    | 6.70      | 3.92     | 15.38     | -123.51  | 93.03     |
| $\delta_{2017}$ Year                                             | 1.83     | 7.33      | 6.02     | 16.84     | -189.58  | 108.70    |
| $\delta_{2018}$ Year                                             | -21.24   | 8.56      | -2.95    | 19.68     | -232.46  | 112.85    |
| $\delta_{2019}$ Year                                             | -33.96   | 8.89      | -42.42   | 20.43     | -298.46  | 127.87    |
| $\delta_{2020}$ Year                                             | -41.89   | 10.08     | -58.08   | 23.15     |          |           |
| Parameter                                                        | Estimate | Std. Dev. | Estimate | Std. Dev. | Estimate | Std. Dev. |
| <b>Random part: LA level</b>                                     |          |           |          |           |          |           |
| Intercept variance                                               | 7486     | 86.52     | 29589    | 172.0     | 569096   | 754.4     |
| <b>Random part: observation level</b>                            |          |           |          |           |          |           |
| Residual variance                                                | 3049     | 55.22     | 16094    | 126.9     | 491203   | 700.9     |
| Deviance                                                         | 9984.1   |           | 11411.9  |           | 14366.1  |           |
| Log likelihood                                                   | -4992.0  |           | -5705.9  |           | -7183.0  |           |
| Number of local authorities                                      | 147      |           | 147      |           | 147      |           |
| Number of observations                                           | 882      |           | 882      |           | 882      |           |
| Note: the outcome is the intervention rate, per 100,000 children |          |           |          |           |          |           |

## Appendix references

- 1 Local Government Association. Outturn weekly expenditure per child: Looked After Children in England. 2021.[https://lginform.local.gov.uk/reports/lgastandard?metric=3435&mod-area=E92000001&mod-group=AllRegions\\_England&mod-type=namedComparisonGroup](https://lginform.local.gov.uk/reports/lgastandard?metric=3435&mod-area=E92000001&mod-group=AllRegions_England&mod-type=namedComparisonGroup) (accessed 20 Oct2021).
- 2 Author's analysis of DfE. Statistics: looked-after children (Collection). 2021.<https://www.gov.uk/government/collections/statistics-looked-after-children>.
- 3 Legatum Institute. Briefing: impact of Universal Credit and WTC Changes on Poverty - Quarter 2, 2021. 2021.
- 4 Department for Work and Pensions. Households below average income: for financial years ending 1995 to 2020. GOV.UK. 2021.<https://www.gov.uk/government/statistics/households-below-average-income-for-financial-years-ending-1995-to-2020> (accessed 2 Jun2021).
- 5 Wickham S, Anwar E, Barr B, Law C, Taylor-Robinson D. Poverty and child health in the UK: Using evidence for action. *Arch Dis Child* 2016; **101**: 759–766.
- 6 Department for Work and Pensions. Children in low income families: local area statistics. GOV.UK. <https://www.gov.uk/government/collections/children-in-low-income-families-local-area-statistics> (accessed 3 Jun2021).
- 7 End Child Poverty. Child poverty in your area 2014/15 – 2019/20. 2021.<http://www.endchildpoverty.org.uk/local-child-poverty-data-2014-15-2019-20/> (accessed 3 Jun2021).
- 8 Harrison XA. Using observation-level random effects to model overdispersion in count data in ecology and evolution. *PeerJ* 2014; **2**: e616.
- 9 Fox J, Weinberg S. *An R Companion to Applied Regression*. Third edit. Sage Publications: Thousand Oaks, California, 2019.
- 10 Bennett DL, Webb CJR, Mason KE, Schlüter DK, Fahy K, Alexiou A *et al*. Funding for preventative Children's Services and rates of children becoming looked after: A natural experiment using longitudinal area-level data in England. *Child Youth Serv Rev* 2021; **131**: 106289.

## Appendix

- 11 Place-based Longitudinal Data Resource. Local Authority Finance: Children's and Young People's Services (s251) - Sure Start Children's Centres and Early Years Services (FIN\_07\_51). 2019.<https://pldr.org/dataset/2zgpe> (accessed 16 Jun2020).
